# Supplementary material for: A food system transformation can enhance global health, environmental conditions and social inclusion
Source: Research Square preprint supplement (doi:10.21203/rs.3.rs-2928708/v1), 2023-06-21
Supplement: Supplementary file 2 [file 6646a6929f6c06b122f1b596.xlsx]

## Sheet: Measure-Indicator Table
			Health			Environment							Inclusion				Economy
FSM name	Description	Limitations	Underweight	Obesity	Premature Mortality	Cropland Landscapes	Hotspot Landscapes	Croparea Diversity	Nitrogen Surplus	Environmental Water Flow Violations	Greenhouse Gas Emissions	Global Surface Warming	Expenditure on Agricultural Products	Poverty	Agricultural Employment	Agricultural Wages	Bioeconomy Supply	Production Costs
		Unit	Million people	Million people	Years of Life Lost (YLL)	Biodiversity Intactness Index	Biodiversity Intactness Index	Shannon Index	Million tons nitrogen per year	km^3 per year	Gt CO2eq per year	Degree Celsius	USD per person per year	Million people living below 3.20$ a day	Million people	Index relative to 2020	Billion USD05/yr	Billion USD05/yr
		Definition and unit	Number of adults with a BMI <18.5 (for people older 15 years) and children and adolescents with a BMI that is 2SD below normal (0-14 years).	Number of adults with a BMI >30 (for people older 15 years) and children and adolescents with a BMI that is 2SD above normal (0-14 years).	Years of life lost (YLL) is a measure of premature mortality that takes into account both the frequency of deaths and the age at which it occurs, using the "Global Burden of Disease standard abridged life table" to represent the standard life expectancy. Definition: One YLL represents the loss of one year of life.	The Biodiversity Intactness index (BII) accounts for net changes in the abundance of organisms based on the loss of forest and non-forest vegetation cover and age class of natural vegetation, which are expressed relative to a reference land-use class (forested or non-forested vegetation) and weighted by a spatially explicit range-rarity layer (unitless). The reference land use (BII = 1) is assume…	The Biodiversity Intactness index (BII) accounts for net changes in the abundance of organisms based on the loss of forest and non-forest vegetation cover and age class of natural vegetation, which are expressed relative to a reference land-use class (forested or non-forested vegetation) and weighted by a spatially explicit range-rarity layer (unitless). The reference land use (BII = 1) is assume…	Measure of crop diversity that takes into account the richness and abundance of different crop groups. The shannon crop diversity index $H_{crop}$ is calculated by $H_crop = - \sum_{k} p_{k} \cdot \log p_{k}$, where $p$ is the share of crop $k$ in the total cropland area in each spatial cluster. Our Croparea Diversity index is based on 6 aggregated croparea classes (see S2.2.4).	Nitrogen surplus in croplands, pastures, natural vegetation and animal waste management in Tg Nr. Nitrogen surpluses in croplands and pastures are the difference between organic and inorganic nutrient inputs and withdrawals by the harvest/grazing. In natural vegetations we assume a stable state where fixation equals surpluses. In animal waste management, surpluses are total excretion minus recycl…	Water withdrawals exceeding the volume that could be withdrawn when taking minimum environmental flow requirements of aquatic and riverine ecosystems into account, in km³	Greenhouse gas emissions from land use and land-use change in Gt CO2 equivalents using a 100 year global warming potential (GWP100 based on AR6).	Degrees Celsius warming of global mean surface temperature (relative to 1951-1980)	Expenditures in USD05 MER per capita per year for agricultural commodities dedicated for food use, excluding the value-added in the supply chain. Estimated as the country-level per-capita food use multiplied with the shadow price (LaGrange Multiplier) of providing one additional unit of food in a world region.	Number of people in millions with a per capita daily income below 3.20 USD11 PPP in each country, based on poverty lines estimated by the World Bank	People working in agriculture (crop and livestock production), in million people	Index describing the development of wages relative to 2020, ratio. As wages we define the mean nominal hourly labor cost per employee, including e.g. remuneration of work performed and payment in kind, social security expenditures and welfare services.	Value stream from food and land system to other economic sectors, including the value of bioenergy, bioplastics, timber and material use of products at fixed prices of 2010. Food demand is considered internal to food system.	Value stream from other economic sectors to food and land system, including labor and capital for agricultural production, R&D expenditures, land expansion expenditures, transport costs, in USD05MER/year. Rents, e.g. land scarcity rents or water scarcity rents, are excluded from costs as they are a transfer payment. Similarly, the difference between minimum wage and labor productivty is excluded …
		Level of aggregation, timely resolution.	Country level, by age cohorts and sex, for a specific year.	Country level, by age cohorts and sex, for a specific year.	Country-level, by sex, for a specific year.	0.5°x0.5°, for a specific year.	0.5°x0.5°, for a specific year.	0.5°x0.5°, for a specific year.	0.5°x0.5°, for a specific year.	0.5°x0.5°, for a specific year.	World region level for a specific year.	Global, for a specific year.	Country-level, for a specific year.	Country-level, for a specific year.	World region level, for a specific year.	Country-level, for a specific year. Aggregation to global level using constant 2010 country-level population data.	World region level, for a specific year.	World region level, for a specific year.
		Limitations	The average per-capita income of a country is the only socio-economic driver used to estimate the prevalence of underweight. Other possible drivers such as inequality within a country, land tenure or market access are not accounted for. While our analysis of past observations shows that correlations of per-capita income to rising BMI have been relatively stable over time and similar across countr…	The average per-capita income of a country is the only socio-economic driver used to estimate the prevalence of obesity. Other possible drivers such as inequality within a country, (super)market access, the role of the food industry, urbanization, advertising, education or globalization are not accounted for. While our analysis of past observations shows that correlations of per-capita income to …	Global Burden of Disease only has projections for SSP1,2,3 in terms of fertility and mortality. We therefore omit any SPP4,5 baseline runs from our analysis of YLL.	Changes in BII values are largely driven by changes in cropland and natural land cover. Biodiversity changes resulting from changes in landscape structure, management or pollution levels are not considered here. The BII provides no information on ecosystem integrity and does not always capture actual declines in biodiversity due to its limited scope. Several key drivers of biodiversity loss are u…	Changes in BII values are largely driven by changes in cropland and natural land cover. Biodiversity changes resulting from changes in landscape structure, management or pollution levels are not considered here. The BII provides no information on ecosystem integrity and does not always capture actual declines in biodiversity due to its limited scope. Several key drivers of biodiversity loss are u…	The crop diversity index distinguishes only between larger crop groups ().	Spatial distribution of livestock is very simplified, allocating GHG emissions rather to the agricultural areas that produce inputs to livestock production, rather than livestock production centers themselves.	Spatial (1000 spatial clusters) and temporal (yearly) resolution tends to under-estimate environmental flow violations	Spatial distribution of livestock is very simplified, allocating GHG emissions rather to the agricultural areas that produce inputs to livestock production, rather than livestock production centers themselves.	These scenarios were assessed using MAgPIE as a stand-alone model. Thus, changes in emissions within the energy sector were not endogenously modelled in this assessment. To estimate energy-sector emissions, we therefore obtained reference REMIND scenarios that approximated the ambitions of our food system transformations. For our business-as-usual scenario, we used the baseline scenario from Sörg…	Agricultural products are only a fraction of total food expenditures due to lack of representation of value-added in food supply chain. The value added post-farm-gate has been found to account for 62-85% of final food expenditures (Yi et al 2020). Estimate do not account for policy interventions such as subsidies or food rations.	Increased food expenditures due to FSM or FSMB do not take into account cross-product substitutions that may reduce heightened expenditures.	Average weekly hours worked are kept constant over time, and we assume the same agricultural wages (mean nominal hourly labor cost per employee) for all crop and livestock categories. Due to data limitations subsistence farming/family work may not be fully included in all countries. Labor productivity is directly linked to agricultural wages (except in exogenous wage scenarios) and therefore incr…	Wages only depend on GDP pc and the exogenous minimum wage (if included); there is no feedback from other measures on wages (the global index might still be affected due to geographical changes in ag. production).	Does not include potential stream of agricultural wastes into bioeconomy sectors, prices do not change in the future. Small fluctuations may occur due to indirect market effects changing the availabiltiy of couple products for Bioeconomy Supply.
		Description of processes that determine the indicator	The country-level share of underweight population is based on age-cohort- and sex-specific GDP regressions (Bodirsky et al 2020) and results in different levels of caloric intake on the basis of metabolic equations that also take into account bodyheight, age, sex and physical activity. As the metabolic relationship between intake and bodyweight is fixed, the regressions can also be more intuitive…	The country-level share of obese population is based on age-cohort- and sex-specific GDP regressions (Bodirsky et al 2020) and results in different levels of caloric intake on the basis of metabolic equations that also take into account bodyheight, age, sex and physical activity. As the metabolic relationship between intake and bodyweight is fixed, the regressions can also be more intuitively int…	This indicator is calculated using the health model of Springmann et al. (2018, 2020) described in "Health Model" section of the methods. It is based on a comparative risk-assessment method, modelling the effects of eight diet and weight-related risk factors on the development of five diseases: Coronary heat disease, stroke, type-2 diabetes, cancer, and respiratory disease.	The BII is primarily influenced by land use change, with highest BII losses occuring at the conversion of primary vegetation to croplands. Land use change in turn is influenced by various factors, including food and feed demand, yield-increasing technological change, international trade in combination with different international land productivites, and specialisation within crop rotations. Cropl…	The BII is primarily influenced by land use change, with highest BII losses occuring at the conversion of primary vegetation to croplands. Land use change in turn is influenced by various factors, including food and feed demand, yield-increasing technological change, international trade in combination with different international land productivites, and specialisation within crop rotations. Hotsp…	The crop diversity index is influenced by the composition of crop demand, land scarcity and penalties for short crop rotations. Land scarcity leads to a specialization of crop rotations towards the highest-yielding crop, while rotational constraints also include crop-type and crop-group specific penalties for fast repetition of crops. Diverse crop rotations can only be achieved if the crop demand…	Nitrogen surpluses on pastures and croplands are determined by the harvested nutrients and by the nitrogen uptake efficiency (NUE). The harvested nutrients depend on food and feed demand and their respective nutrient content. The NUE is determined by the share of nitrogen fixers in the crop mix, by the baseline nitrogen use efficeincy and by the application of NUE-improving mitigation measures. N…	Environmental flow violations are the withdrawal volume that exceeds water that would be available while maintaining a minimum level of environmental flow requirements (available water minus EFRs) in each spatial simulation cluster in the growing period. Environmental flow requirements and water availability in the growing period are calculated based on monthly runoff and discharge at 0.5° resolu…	MAgPIE models endogenously the emissions from CO2, CH4, and NO2. CO2 emissions emerge from both land-use change as well as the growth of natural vegetation. CH4 is emitted from the burning of agricultural residues, the convertion of peatlands for agriculture, as well as rice production, animal waste management, and finally enteric fermentation. NO2 emissions also originate from animal waste manag…	Global warming is estimated using the climate emulator MAGICC (Meinshausen et al 2009, 2011, 2020). It projects warming based on emissions from land use, landuse change and other sectors (such as the energy sector), see further details and references in the ‘Climate Models’ section of methods.	Per capita calorie demand as calculated in MAgPIE food demand module multiplied by MAgPIE agricultural commodity prices.	The number of people with daily incomes below the poverty line is calculated by constructing national income distributions via Monte Carlo simulations, taking into account real per capita incomes which change due to changing food expenditures. Any price on emissions and agricultural rotations, as well as agricultural wages are re-distributed proportionally back to per capita incomes as well. The …	The number of people employed in agriculture is calculated by dividing total labor costs by the average costs of one worker in a year (weekly hours*weeks in a year*wage). Total labor costs are calculated as a share of factor costs (depending on GDP pc and labor-capital substitution), which in turn depends on agricultural production and factor requirements per output. Agricultural wages are based …	Agricultural wages are calculated based on a regression with GDP pc (calibrated on country level). An exogenous minimum wage can further increase wages in low income countries. To allow global aggregation, this index reports the development of wages relative to 2020 instead of actual wages.	Demand for bioeconomy products (timber, bioenergy crops, and other utlizations) multiplied by initial price level.	Costs estimates stem from multiple sources. Labor and capital costs from FAOSTAT, USDA and GTAP, research and development from ASTI database, transport costs from GTAP, and land conversion costs are calibrated in a pre-model run stage
LowProcessed	The intake of sugars is capped at the recommended intake by the planetary health diet (Willet et al 2019, Springmann et al 2018), while the intake of plant-based oils and fats are converged towards the planetary health diet. Alcohol consumption was limited to a maximum of 1.4% of calorie intake (Lassen et al. 2020). In the health model we assume that grains are consumed as wholegrains. The consum…	Diet change by assumption (e.g. preference change) without specifying the policy instruments for implementation.	No interaction modeled. Non-modeled interactions may include lower undernutrition due to more balanced nutrient intake.	No interaction modeled. Non-modeled interactions may include lower overweight due to lower energy-density of food.		The slightly different composition of plant-based food demand on the BII in cropland landscapes is marginal.	The slightly different composition of plant-based food demand on the BII in landscapes with a high relevance for biodiversity conservation is marginal.	A lower demand for oilcrops and sugarcrops and a higher demand of grains and roots leads to a change in cropping patterns. Depending on the inital cropping patterns, this can lead to an increase or a decrease of local croparea diverstiy.	A shift away from processed foods towards whole grain does not change the agricltural inputs needed to produce the raw agricultural products, thus no interaction is modelled.	Less pressure on land and water resources and therefore fewer environmental flow violations. (Note to benni.bausb@googlemail.com: not sure what's exactly the mechanism.)	A shift away from processed foods towards whole grain does not change the agricltural inputs needed to produce the raw agricultural products, thus no interaction is modelled.	A shift away from processed foods towards whole grain does not change the agricltural inputs needed to produce the raw agricultural products, thus no interaction is modelled.	Lower expenditure due to a less expensive consumption basket	Indirect effects from lower food expenditures due to less expensive consumption basket.	Due to different labor requirements in the production of specific crop types, the change in dietary composition can lead to slightly different agricultural emplyoment	No interaction modeled.	The bioeconomy supply is not directly influenced. Small indirect effects may occur via a different availability of couple products for the bioeconomy.	A substitution of sugar, oil and alcohol demand by grains and tubers reduces production costs, which in our model also include the first stage of processing.
HighLegumes	The intake of legumes is increased to the recommendation by the planetary health diet (Willet et al 2019, Springmann et al 2018) in countries where these values are not already fulfilled. The consumption of staple foods (cereals, roots, tubers) is reduced to keep total food calorie intake constant.	Diet change by assumption (e.g. preference change), policy instruments for implementation are unclear. Affordabiltiy is reflected by expenditure and poverty indicators.	No interaction modeled. Non-modeled interactions may include lower undernutrition due to more balanced nutrient intake.	No interaction modeled. Non-modeled interactions may include lower overweight due to increased fibre intake, yet empirical studies find mixed evidence.	A shift away from staple crops towards diets rich in legumes significantly decreases rates of disease from overnutrition.	The model considers that legumes, with lower crop yields than cereals or potatoes which they replace, lead to slightly increasing land scarcity and potential cropland expansion. We do not consider that integration of legumes in crop rotations can have benefits for crop yields of the entire cropping system.	The model considers that legumes, with lower crop yields than cereals or potatoes which they replace, lead to slightly higher land scarcity and expansion into biodiversity hotspots and intact forests. We do not consider that integration of legumes in crop rotations can have benefits for crop yields of the entire cropping system.	Higher amount of legumes in crop rotations leads to a higher overall crop diversity	Shift from staples to pulses causes changes in nutrient requirements. The model accounts for the higher protein content of legumes when calculating nitrogen requirements and also accounts for a higher NUE of legumes. The model also accounts for different uptake and recycling of crop residues between different crop types. Biologically fixed nitrogen increases, while inorganic fertilizer consumptio…	Shift from staples to pulses causes more production of pulses under irrigated conditions and increases environmental flow violations.	WIthin our scenarios, a dietary shift towards legumes is model as a replacement of staple crops, rather than meat products. As such, our transition scenario omits potential reductions in GHG emissions from the replacement of meat-sourced proteins with plant-sourced ones. Thus, as legumes need more land to achieve yields equivalent to staple crops, GHG emissions slightly increase within this scena…	Although GHG emissions increase slightly within the DietLegumes scenario, these extra emissions do not drive an increase in global warming within the timeframe of this analysis.	Higher expenditure due to a more expensive consumption basket	Indirect effects from higher food expenditures due to more expensive consumption basket.	Increased intake of legumes is balanced by reduced intake of staples. Legumes in general have higher factor requirements than staples, which can lead to higher employment	No interaction modeled.	The bioeconomy supply is not directly influenced. Small indirect effects may occur via a different availability of couple products for the bioeconomy.	A substitution of grains and tubers by legumes increases production costs as legeumes are more cost-intensive in cultivation. Systemic benefits on legumes on subsequent crops are only considered with respect to nitrogen requirements, but not with respect to crop protection or yield benefits.
LowMonogastrics	The intake of poultry meat, monogastric meat and eggs is capped at the recommended intake of the planetary health diet (Willet et al 2019, Springmann et al 2018). The consumption of staple foods (cereals, roots, tubers) is adjusted to keep total food calorie intake constant.	Diet change by assumption (e.g. preference change), policy instruments for implementation are unclear. Affordabiltiy is reflected by expenditure and poverty indicators.	No interaction modeled. Non-modeled interactions may include lower undernutrition due to more balanced nutrient intake when intake levels for animal products are increased in low-income countries.	No interaction modeled. Non-modeled interactions may include lower obesity in high-income countries when animal-source product consumption is decreased.	Within the DietMonogastic scenario, calories from monogastic meats are replaced by staple foods, as opposed to healthier sources of calories such as legumes. Thus, there is only a slight decline in total years of life lost in this dietary transition scenario.	Shift from animal products to plant-based products results in less pressure on land resources and therefore reduces the need to increase the share of cropland in already cultivated landscapes.	Shift from animal products to plant-based products results in less pressure on land resources and therefore less expansion into biodiversity hotspots and intact forests.	Lower overall cropland area due to the reduced demand for feed concentrates leads to a relative increase of the crop diversity.	A shift from animal products to plant products causes in the model a decrease of feed demand which is specific to the regional feed mix, and an increase of food demand, whereby the net-effect is usually causing a reduction in total crop and pasture demand, and also a reduction of total fertilization requirements. As most legumes are eaten by animals, also biological nitrogen fixation is reduced. …	Less pressure on land and water resources due to shift from animal products to plant based products and therefore fewer environmental flow violations.	A shift from monogastic products towards plant products reduces global warming, albeit significantly less than a transition away from ruminant meats. This disparity emerges as monogastics emit no CH4 from enteric fermentation, and do not drive the conversion of land for pasture grazing.	A shift from monogastrics towards plant products does not appreciably change the temperature pathway until the year 2050 in our scenarios.	Lower expenditure due to a less expensive consumption basket	Indirect effects from lower food expenditures due to less expensive consumption basket.	A shift of poultry and monogastric meat and eggs intake to quantities recommended by the EAT Lanctet diet leads to a global reduction in agricutlural production (reduced feed demand outweights increased food demand), thereby leading to lower agricultural employment	No interaction modeled.	The bioeconomy supply is not directly influenced. Small indirect effects may occur via a different availability of couple products for the bioeconomy.	As livestock production has a high value-added, production costs strongly decrease with a substitution of livetock products by staple products.
LowRuminants	The intake of ruminant meat and milk products is capped at the recommended intake of the planetary health diet (Willet et al 2019, Springmann et al 2018). The consumption of staple foods (cereals, roots, tubers) is adjusted to keep total food calorie intake constant.	Diet change by assumption (e.g. preference change), policy instruments for implementation are unclear. Affordabiltiy is reflected by expenditure and poverty indicators.	No interaction modeled. Non-modeled interactions may include lower undernutrition due to more balanced nutrient intake when intake levels for animal products are increased in low-income countries.	No interaction modeled. Non-modeled interactions may include lower obesity in high-income countries when animal-source product consumption is decreased.	Within the DietRuminant scenario, calories from ruminant meats are replaced by staple foods, as opposed to healthier sources of calories such as legumes. Thus, there is only a slight decline in total years of life lost in this dietary transition scenario.	Shift from animal products to plant-based products results in less pressure on land resources and therefore reduces the need to increase the share of cropland in already cultivated landscapes.	Shift from animal products to plant-based products results in less pressure on land resources and therefore less expansion into biodiversity hotspots and intact forests.	Lower overall cropland area due to the reduced demand for feed concentrates leads to a relative increase of the crop diversity.	A shift from animal products to plant products causes in the model a decrease of feed demand which is specific to the regional feed mix, and an increase of food demand, whereby the net-effect is usually causing a reduction in total crop and pasture demand, and also a reduction of total fertilization requirements. As most legumes are eaten by animals, also biological nitrogen fixation is reduced. …	Less pressure on land and water resources due to shift from animal products to plant based products and therefore fewer environmental flow violations.	A shift from animal products to plant products reduces global warming through a number of pathways. By reducing the conversion of forest to pasture, emissions from CO2 are reduced. By reducing the total number of ruminants, CH4 and NO2 from animal waste management are also reduced. Further, fewer ruminants mean less cropland is used for the production of fodder. This reduces total emissions from …	A shift from animal products towards plant products dramatically reduces emissions from land conversion and agriculture, thus decreasing the ensuing global warming.	Lower expenditure due to a less expensive consumption basket	Indirect effects from lower food expenditures due to less expensive consumption basket.	A shift of ruminant meat and milk intake to quantities recommended by the EAT Lanctet diet leads to a global reduction in agricutlural production (reduced feed demand outweights increased food demand), thereby leading to lower agricultural employment	No interaction modeled.	The bioeconomy supply is not directly influenced. Small indirect effects may occur via a different availability of couple products for the bioeconomy.	As livestock production has a high value-added, production costs strongly decrease with a substitution of livetock products by staple products.
DietVegFruisNutsSeeds	The intake of vegetables, fruits, nuts and seeds is increased to levels recommended by the planetary health diet (Willet et al 2019, Springmann et al 2018). The consumption of staple foods (cereals, roots, tubers) is adjusted to keep total food calorie intake constant.	Diet change by assumption (e.g. preference change), policy instruments for implementation are unclear. Affordabiltiy is reflected by expenditure and poverty indicators.	No interaction modeled. Non-modeled interactions may include lower undernutrition due to more balanced nutrient intake.	No interaction modeled. Non-modeled interactions may include lower overweight due to increased fibre intake, yet empirical studies find mixed evidence.	A shift away from staple crops towards a diet rich in vegetables, fruits, nuts, and seeds increases the quality of nutrition globally, thus dramatically reduces the number of years of lift lost due to overnutrition.	Indirect effects via new cropping patterns that change the relative attractiveness for land expansion in the model. High transport costs of fruits and vegetables incentivize an agglomerated production close to population centers.	Indirect effects via new cropping patterns that change the relative attractiveness for land expansion in the model.	Increased demand for vegetables, fruits, nuts and seeds results in a higher crop diversity.	Shift from staples to vegetables, fruits, nuts and seeds causes changes in nutrient requirements. The model accounts for the different nitrogen contents in the harvested crops, but not for the different nitrogen uptake efficiencies due to different management of these crops. The model also accounts for different uptake and recycling of crop residues between different crop types. As these food pro…	Less irrigation of staple crops, but more irrigation of fruits, vegetables and nuts. Fruits, vegetables and nuts are more water intensive than staples. This increases the pressure on water resources and leads to more environmental flow violations.	Shifts from staples to vegetables, fruits, nuts, and seeds does not substantially change the emissions from the agricultural sector, as modelled in our scenarios.	Shifts from staples to vegetables, fruits, nuts, and seeds does not substantially change total global warming in our scenarios.	Higher expenditure due to a more expensive consumption basket	Indirect effects from higher food expenditures due to more expensive consumption basket.	Increased intake of fruits, vegetable, nuts and seeds leads to higher employment, as these products are more labor intensive in production	No interaction modeled.	The bioeconomy supply is not directly influenced. Small indirect effects may occur via a different availability of couple products for the bioeconomy.	Fruits, vegetables and nuts have higher production costs than staple crops. There are further diffuse effects via impacts on land and water scarcity as well as fertilization requriements.
HalfOverweight	Calorie intake is reduced to achieve a reduction of overweight and obesity by 50% relative to the BASE scenario. Calorie reduction is BMI-class, country, age-group and sex specific. Intake of half of the people overweight or obese (BMI>25 for adults, BMI +/-1STD for children) is reduced to intake recommended for a healthy BMI (20-25, BMI <+1STD). Relative dietary composition is not affected. Inta…	The exogenously enforced reduction of overnutrition represents a decoupling of BMI from general economic development, which implicitly suggests the occurrence of disruptive changes or policy interventions in this scenario beyond the extent that is captured in observational data. Policies that lead to this shift are not specified. Barriers and time lags e.g. due to persistence of risk factors for …	No interaction modeled.	The reduction in population obese is prescribed via exogenous scenario assumptions, enforcing zero obesity in 2050.	Reducing caloric intake to ensure healthy BMIs reduces mortality due to diseases of overnutrition.	Reducing calorie intake of population subgroups with a BMI above the scenario threshold decreases food demand and overall agricultural production, which slightly reduces the need to increase the share of cropland in already cultivated landscapes.	Reducing calorie intake of population subgroups with a BMI above the scenario threshold decreases food demand and overall agricultural production, which slightly reduces the need to expand agricultural areas into biodiversity hotspots and intact forests.	Reducing calorie intake of population subgroups with a BMI above the scenario threshold decreases food demand and overall agricultural production, leading to a small reduction in land scarcity and thus slightly fewer incentives to shorten rotations.	Reducing calorie intake of population subgroups with a BMI above the scenario threshold decreases food demand and overall agricultural production, reducing nutrient requirements and nitrogen surpluses from agricultural production.	Reducing calorie intake of population subgroups with a BMI above the scenario threshold decreases food demand and thus pressures on water and land resources, leading to lower environmental flow violations.	Reducing calorie intake of population subgroups with a BMI above the scenario threshold, which in consequence proportionally reduces food waste, results in lower food demand and lower agricultural production overall. In turn, this leads to a decrease in emissions from agricultural activities and slightly lowers the need to expand agricultural areas, which abates emissions from deforestation and o…	Reducing calorie intake of population subgroups with a BMI above the scenario threshold results in lower food demand and lower agricultural production overall. This leads to a decrease in emissions from agricultural activities and slightly lowers the need to expand agricultural areas, which abates emissions from deforestation and other land-use change processes. Lower emissions along the food sup…	Since fewer calories are consumed on average and also proportionally less food is wasted at the household level, less food needs to be purchased. In addition, food prices per unit are slightly lower due to lower agricultural production and resource scarcity (land and water).	Reducing calorie intake of population subgroups with a BMI above the scenario threshold results in lower food expenditures, leading to slightly lower poverty estimates.	Reducing calorie intake of population subgroups with a BMI above the scenario threshold reduces overall agricultural production and leads to lower employment.	No interaction modeled.	The bioeconomy supply is not directly influenced. Small indirect effects may occur via a different availability of couple products for the bioeconomy.	No direct costs. Systemic effects are lower production costs due to lower average caloric intake and thus lower food demand.
NoUnderweight	Calorie intake is increased in line with a complete eradication of underweight until 2050 for all age cohorts and sex classes in all countries. Calorie increase is BMI-class, country, age-group and sex specific. Caloric intake of adults with BMI<20 and children with BMII < -1STD is increased to the intake recommended for a healthy BMI (20-25, BMI <+1STD). Relative dietary composition is not affec…	The exogenously enforced reduction of undernutrition represents a decoupling of BMI from general economic development, which implicitly suggests the occurrence of disruptive changes or policy interventions in this scenario beyond the extent that is captured in observational data. Policies that lead to this shift are not specified. Barriers and time lags e.g. due to persistence of risk factors for…	The reduction in population underweight is prescribed via exogenous scenario assumptions, enforcing zero underweight in 2050.	No interaction modeled.	Ensuring caloric sufficiency eliminates mortality due to undernurishment and thus reduces the total number of years of life lost.	Increasing calorie intake of population subgroups with a BMI below the scenario threshold results in a small increase in food demand and agricultural production, marginally increasing the need to increase the share of cropland in already cultivated landscapes.	Increasing calorie intake of population subgroups with a BMI below the scenario threshold does not lead to more land conversion in hotspot landscapes.	Increasing calorie intake of population subgroups with a BMI below the scenario threshold results in a small increase in food demand and agricultural production, leading to slightly higher land scarcity and thus marginally higher incentives to shorten rotations, however, with negligible impacts on crop diversity at the aggregate level.	Increasing calorie intake of population subgroups with a BMI below the scenario threshold results in a small increase in food demand and agricultural production, marginally raising nutrient requirements and nitrogen surpluses from agricultural production.	Increasing calorie intake of population subgroups with a BMI below the scenario threshold results in a small increase in food demand and thus pressures on water and land resources, marginally increasing environmental flow violations.	Increasing calorie intake of population subgroups with a BMI below the scenario threshold, which in consequence also proportionally increases food waste, results in a small increase in food demand and overall agricultural production. This leads to a very small increase in emissions from agricultural activities and from deforestation and other land-use change processes.	Increasing calorie intake of population subgroups with a BMI below the scenario threshold results in a small increase in food demand and overall agricultural production. This leads to a very small increase in emissions from the AFOLU sector, although the impact on global warming at the aggregate level is hardly discernible. Changes along the food supply chain outside the AFOLU sector are not cons…	Since more calories are consumed on average and also proportionally more food is wasted at the household level, more food needs to be purchased. In addition, food prices per unit are marginally higher due to higher agricultural production and resource scarcity (land and water).	Increasing calorie intake of population subgroups with a BMI below the scenario threshold results in higher food expenditures, leading to slightly higher poverty estimates.	The somewhat higher food demand leads to an overall increase in agricultural production and thereby higher employment	No interaction modeled.	The bioeconomy supply is not directly influenced. Small indirect effects may occur via a different availability of couple products for the bioeconomy.	No direct costs. Systemic effects are an increase of food production costs to produce additional calories, and resulting effects on land and water scarcity.
LowFoodWaste	Food waste in households and retail (difference between calorie intake and FAO food availability) is reduced to a maximum of 20% of intake.	The exogenously enforced reduction of food waste represents a decoupling of food waste from general economic development, which implicitly suggests the occurrence of disruptive changes, preference change, technological or social innovation or policy interventions in this scenario beyond the extent that is captured in observational data.	No interactions modeled. Real interactions include systemic effects via reduced food expenditures.	No interaction modeled.	While lower food waste reduces other negative impacts of excess agricultural production, the total years of life lost will remain constant.	Food waste reductions decrease food demand and overall agricultural production, reducing the need to increase the share of cropland in already cultivated landscapes.	Food waste reductions decrease food demand and overall agricultural production, reducing the need to expand agricultural areas into biodiversity hotspots and intact forests.	Food waste reductions decrease food demand and overall agricultural production, resulting in less land scarcity and thus less incentives to shorten crop rotations.	Food waste reductions decrease food demand and overall agricultural production, reducing nutrient requirements and nitrogen surpluses from agricultural production.	Decreasing pressure on water and land resources because of less food waste and less need to produce agricultural products leading to lower environmental flow violations.	Food waste reductions decrease food demand and overall agricultural production, reducing emissions from agricultural production as well as the need to expand agricultural areas, which avoids emissions from deforestation and other land-use change processes.	Food waste reductions decrease food demand and overall agricultural production, reducing emissions from agricultural production as well as the need to expand agricultural areas, which avoids emissions from deforestation and other land-use change processes. Lower emissions along the food supply chain outside the AFOLU sector are not considered, e.g. due to less food processing, packaging, cooling …	With less food waste at the household level, less food needs to be purchased for the same food intake. In addition, per-unit food prices are lower due to lower agricultural production and resource scarcity (land and water).	Food waste reductions result in lower food expenditures, leading to lower poverty estimates.	Less food waste reduces overall agricultural production and leads to lower employment.	No interaction modeled.	The bioeconomy supply is not directly influenced. Small indirect effects may occur via a different availability of couple products for the bioeconomy.	No direct costs. Systemic effects are lower production costs due to a reduction in food waste.
LibTrade	Trade is less oriented along historical trade patterns and more along relative competitiveness. MAgPIE uses two trade pools (Schmitz et al 2013): The "historic trade pool" is based on historical trade patterns, with importing countries importing a constant share of their domestic demand, and exporting countries providing a constant share of global trade. This reflects historical trade distortions…		No interaction modeled.	No interaction modeled.	No interaction modelled.	Slight indirect effect where increased trade allows for further specialization, avoiding some biodiversity-important landscapes	Slight indirect effect where increased trade allows for further specialization, avoiding some biodiversity-important landscapes	No direct interaction	Liberalized trade facilitates specialization and production in areas with highest productivity. This allows for increased production in areas with higher nitrogen use efficiency, slightly reducing nitrogen surpluses	Liberalized trade facilitates specialization and production in areas with highest productivity. This reduces the pressure on water and land resources and reduces environmental flow violations.	Slight indirect effect as liberalized trade facilitates specialization and production in areas with highest productivity and efficiency, reducing GHG emissions.	Slight indirect effect as liberalized trade facilitates specialization and production in areas with highest productivity and efficiency, reducing GHG emissions.	Slight indirect effect as liberalized trade facilitates specialization and production in areas with highest productivity and efficiency, reducing production costs.	Indirect effects via reduced expenditures for agricultural products. Trade-induced specialization leads to structural changes in agricultural economy with less agricultural employment, which in reality could lead to higher poverty rates, not accounted for in the model.	Trade liberalization leads to a shift of agricultural production to more competitive regions -> lower factor requirements -> lower labor costs -> lower employment	No interaction modeled.	The bioeconomy supply is not directly influenced. Small indirect effects may occur via a different availability of couple products for the bioeconomy.	Increased flexibility in trade allows for production to concentrate more strongly in higher-yielding world regions, reducing production costs.
MinWage	A global minimum wage increases wages in the lower income countries. The minimum wage scenario increases wages to at least 3 USD05MER by 2050. In the model, it raises production costs, causes a labor substitution by capital, and increases nominal incomes.	There is no regional differentiation in minimum wage. Substitution between labor and capital is only implemented for crop production (not for livestock production)	No interaction modeled. Non-modeled interaction may come from reduced underweight of agricultural workers, but higher food prices may reduce real incomes of urban population and increase undernutrition there.	No interaction modeled.	No interaction modelled.	The introduction of a minimum wage increases production costs in countries where wages are affected. This makes the countries without wage changes relatively more competitive, which leads to a slight shift of agricultural production e.g. from SSA to the USA. By this, the introduction of a minimum wage can have indirect effects on environmental indicators	The introduction of a minimum wage increases production costs in countries where wages are affected. This makes the countries without wage changes relatively more competitive, which leads to a slight shift of agricultural production e.g. from SSA to the USA. By this, the introduction of a minimum wage can have indirect effects on environmental indicators	The introduction of a minimum wage increases production costs in countries where wages are affected. This makes the countries without wage changes relatively more competitive, which leads to a slight shift of agricultural production e.g. from SSA to the USA. By this, the introduction of a minimum wage can have indirect effects on environmental indicators	The introduction of a minimum wage increases production costs in countries where wages are affected. This makes the countries without wage changes relatively more competitive, which leads to a slight shift of agricultural production e.g. from SSA to the USA. By this, the introduction of a minimum wage can have indirect effects on environmental indicators	The introduction of a minimum wage increases production costs in countries where wages are affected. This makes the countries without wage changes relatively more competitive, which leads to a slight shift of agricultural production e.g. from SSA to the USA. By this, the introduction of a minimum wage can have indirect effects on environmental indicators	The introduction of a minimum wage increases production costs in countries where wages are affected. This makes the countries without wage changes relatively more competitive, which leads to a slight shift of agricultural production e.g. from SSA to the USA. By this, the introduction of a minimum wage can have indirect effects on environmental indicators	The introduction of a minimum wage increases production costs in countries where wages are affected. This makes the countries without wage changes relatively more competitive, which leads to a slight shift of agricultural production e.g. from SSA to the USA. By this, the introduction of a minimum wage can have indirect effects on environmental indicators	The introduction of a minimum wage increases agricultural production costs, which leads to higher prices and thereby higher expenditure for agricultural products	The introduction of a minimum wage leads to higher production costs and thereby higher food expenditure. Higher agricultural incomes are redistributed proportionally to the entire population, such that the positive effect of higher wages is lower than the negative effect of higher food expenditure, overall leading to more people living below the poverty threshold. (Typically, agricultural labor i…	The introduction of the minimum wage leads to higher overall labor costs, and therefore a shift from labor to capital as input to agricultural production, which reduces agricultural employment. We do not account for population-group specific income effects of minimum wages; as agricultural labor has low incomes and high expenditure shares for food, a redistribution of income towards agricultural …	Wages increase as prescribed by external minimum wage	The bioeconomy supply is not directly influenced. Small indirect effects may occur via a different availability of couple products for the bioeconomy.	The minimum wage, exceeding labor productivity, leads to a substitution of labor by capital and an increase in total factor usage for production which is accounted for in the costs. The difference between minimum wage and labor productivity is not counted as costs, as it is a transfer from consumers to workers which does not reduce the overall production capacity of the economy beyond the ineffic…
CapitalSubst	In countries with high capital intensity, capital is substituted by labor. We set a global target for the labor:capital share of 80:20. If countries exceed the capital share, we reduce the difference to this target by 50% until 2050. Substituting capital by labor increases employment but comes at additional production costs.	This scenario is only implemented for crop production (not livestock production).	No interaction modeled.	No interaction modeled.	No interaction modelled.	The introduction of a minimum labor share out of labor+capial costs leads to some relocation of agricultural production with minimal but diffuse implications on environmental indicators	The introduction of a minimum labor share out of labor+capial costs leads to some relocation of agricultural production with minimal but diffuse implications on environmental indicators	The introduction of a minimum labor share out of labor+capial costs leads to some relocation of agricultural production with minimal but diffuse implications on environmental indicators	The introduction of a minimum labor share out of labor+capial costs leads to some relocation of agricultural production with minimal but diffuse implications on environmental indicators	The introduction of a minimum labor share out of labor+capial costs leads to some relocation of agricultural production with minimal but diffuse implications on environmental indicators	The introduction of a minimum labor share out of labor+capial costs leads to some relocation of agricultural production with minimal but diffuse implications on environmental indicators	The introduction of a minimum labor share out of labor+capial costs leads to some relocation of agricultural production with minimal but diffuse implications on environmental indicators	Substitution of capital by labor leads to overall higher factor requirements in crop production, which leads to slightly higher expenditure for agricultural products	The slightly increased expenditure for agricultural products due to increased factor requirements in crop production translate into slightly more people living below the poverty threshold	Substitution of capital by labor as input to crop production leads to higher agricultural employment	No interaction modeled.	The bioeconomy supply is not directly influenced. Small indirect effects may occur via a different availability of couple products for the bioeconomy.	The substitution from capital to labor leads to overall higher factor costs in crop production, thereby also increasing overall costs
REDD+	Deforestation is disincentivized and regeneration of original vegetation is incentivized through a carbon price on C in aboveground vegetation in non-agricultural land. The “REDD+” scenario provides carbon-price induced incentives for reducing deforestation and for the regeneration of original vegetation (Humpenöder et al, 2014). Regeneration uses growth curves and carbon stocks of natural vegeta…	The GHG price applied for AFOLU is lower than the one used in the other economic sectors as higher GHG prices in the LU sector have low additional mitigation effects, but create unnecessary trade-offs with other outcome indicators like food expenditure. The GHG price in 2050 is 185 USD05MER per tCO2eq in AFOLU and 494 USD05MER per tCO2eq in other sectors.	No interaction modeled.	No interaction modeled.	No interaction modelled.	Avoided deforestation also leads to protection of forest vegetation cover within cropland landscapes, which results in an increase of the biodiversity intactness index	Conservation of forested land can contribute to an increase in BII	Intensification of agricultural production due to land scarcity could have negative effect on crop diversity	No direct fertilization requriements for forests in MAgPIE. Indirect effects via cropland intensification which can increase nitrogen use for intensifying cropland use.	No direct impact on environmental flow violations. Indirect impacts due to increased land scarcity. This might result in increasing pressure on water resources because of increasing land use competition and therefore more environmental flow violations	Pricing aboveground C helps in avoiding deforestation and lower GHG emissions from land use change. Incentivising regeneration helps in increased regrowth which removes emissions from the atmosphere as well.	Avoiding deforestation and lower GHG emissions from land use change. Incentivising regeneration helps in increased regrowth which removes emissions from the atmosphere as well. Avoided deforestation can also help in reduction of local warming due to biophysical feedbacks.	No direct effects. Indirectly results in increased food prices due to land scarcity for agricultural purposes.	Indirect effects via increased expenditures for agricultural products.	No direct impact. Employment does not include employment in forest sector.	No interaction modeled.	The bioeconomy supply is not directly influenced. Small indirect effects may occur via a different availability of couple products for the bioeconomy.	Additional costs for removing carbon from forests acts as a penalty term for the cost minimization objective of the model.
LandConservation	By 2030, the ~15% of global land area under protection are doubled to 30%. We assume that the enlargement of protected areas includes both a reactive and proactive component (Brooks et al., 2006, Kreidenweis et al 2016). The reactive component focuses on biodiversity hotspots (BH), the proactive component considers large areas (>500 km2) of unprotected intact forest landscapes (IFL), mainly in th…	Key biodiversity areas that have been proposed as conservation priority areas using a criteria-based approach are not included in this implementation. We furthermore do not explicitly model land use within protected areas, although the land types in MAgPIE do not preclude sustainable land use within protected areas. Protected areas therefore do not contribute to overall production.	No interaction modeled.	No interaction modeled.	No interaction modelled.	The enlargement of protected areas increases pressure on cropland landscapes, which leads to a reduction of the biodiversity intactness index.	Land protection leads to a reduction in agricultural land and an increased cover of intact forest and non-forest vegetation cover, which drives the biodiversity intactness index. (In results: increase everywhere except EUR)	Strict protection and conservation of natural land leads to concentration of cropland in remaining land and lower crop diversity in these areas (In results: in most regions decrease (GLO, IND, CHA, ANZ, OAS, MEA, NEU, SSA); increase only in NEA)	Reducing the total area available for cropland expansion may induce intensification of existing croplands and thus increase nitrogen surplus. However, in these scenarios the effect is minimal.	Indirect effect via increased competition for land through strict protection and conservation of natural lands leads to more irrigation in remaining croplands and therefore more environmental flow violations	This scenario prohibits land-use change (and the subseuqent emissions) in protected areas, which will in particular safeguard carbon stored in forests. However, eco-region based protection may also lead to land-use change in some other areas and therefore increase in emissions. In our scenarios, we observe the positive beneifts of reduced deforestation are most dominant.	Reductions in emissions from AFOLU will limit global warming. Over the timescale of this study, this effect is marginal.	Increased competition for land through strict protection and conservation of natural lands leads to higher prices for agricultural products (In results: globally slight increse, but spikes in several regions and globally in 2030)	Indirect effects via increased expenditures for agricultural products.	Protection of land can shift production to different regions, which can have higher or lower labor productivity and factor requirements, thereby leading to more or less agricultural employment (in results: no effect observed)	No interaction modeled.	The bioeconomy supply is not directly influenced. Small indirect effects may occur via a different availability of couple products for the bioeconomy.	No direct costs. Systemic effects are induced by a reduction of agricultural land which cannot be used for production anymore. This increases land scarcity, which induces costs for intensification, land expansion, irrigation expansion or trade.
PeatlandRewetting	Drainage of intact peatland is disincentivized and rewetting of drained peatlands is incentivized through the AFOLU GHG price. GHG emissions from drained und rewetted peatlands are estimated based on IPCC wetland GHG emissions factors (Humpenöder et al 2020 ERL). Drainage of peatlands is linked to the expansion manged lands (cropland, pasture, forestry). Likewise, rewetting of peatlands is linked…	The GHG price applied for AFOLU is lower than the one used in the other economic sectors as higher GHG prices in the LU sector have low additional mitigation effects, but create unnecessary trade-offs with other outcome indicators like food expenditure. The GHG price in 2050 is 185 USD05MER per tCO2eq in AFOLU and 494 USD05MER per tCO2eq in other sectors.	No interaction modeled.	No interaction modeled.	No interaction modelled.	Direct biodiversity effects of peatland drainage and rewetting are not accounted for. But indirect effects due changes in managed land are accounted for.	Direct biodiversity effects of peatland drainage and rewetting are not accounted for. But indirect effects due changes in managed land are accounted for.	Direct biodiversity effects of peatland drainage and rewetting are not accounted for. But indirect effects due changes in managed land are accounted for.	Limiting agricultural expansion into peatland ecosystems drives a sligh increase in agricultural intensification, and thus slightly increases nitrogen surplus.	Indirect effect via increased competition for land leads to more irrigation in remaining croplands and therefore more environmental flow violations	Drained peatlands emit CO2 over decades to centuries until the peat carbon stock is depleted. Rewetting of peatlands, i.e. rasing the water table, considerably reduces CO2 emissions. Higher CH4 emissions of rewetted peatlands are accounted for.	The change in global surface temperature from peatland restoration emerges from the interplay between an increase in shorter-lived CH4 emissions and a decrease in CO2 emissions. Over the timescale of this study (until 2050), the net effect of an increase in CH4 from rewetted peatlands and the decrease in CO2 emissions lead to no difference in global surface temperature.	Rewetting of peatlands currently used for agriculture or forestry may increase competition for land locally, which could increase expenditures for agricultural products.	Indirect effects via increased expenditures for agricultural products.	No effect on agricultural employment	No interaction modeled.	The bioeconomy supply is not directly influenced. Small indirect effects may occur via a different availability of couple products for the bioeconomy.	Direct costs include costs for rewetting. Systemic effects are induced by a reduction of agricultural land which cannot be used for production anymore. This increases land scarcity, which might induce costs for intensification, land expansion, irrigation expansion or trade.
WaterConservation	Spatially explicit minimum environmental water flow requirements (Smakhtin et al. 2004) have to be maintained and cannot be withdrawn (for irrigation or non-agricultural usage).	1) Water availability and environmental flow requirements as well as water demands (agricultural and non-agricultural) are considered at the spatial resolution of spatial clusters. These are based on bio-physical similarity (e.g., irrigation water requirements and water availability), but may span large distances and cross river basin boundaries or water management borders. This tends to over-est…	No interaction modeled.	No interaction modeled.	No interaction modelled.	Direct effect on aquatic biodiversity not accounted for. Indirect effects due to land use change and relocation of crops as reaction to reduction of irrigated areas.	Direct effect on aquatic biodiversity not accounted for. Indirect effects due to land use change and relocation of crops as reaction to reduction of irrigated areas.	Indirect effect via relative difference in irrigated and rainfed crop yields. More specialization because of selection of highest yielding crop under rainfed conditions.	No interaction modelled.	No violations of environmental flows enforced by scenario	Indirect effects due to land-use change as reaction to reduction of irrigated areas lead to slightly increase emissions from the land-use sector globally.	A slight increase in emissions from land-use change will lead to a commensurate increase in global surface temperature. However, over the timescale of this study the effects are marginal.	Influenced by the costs of production that are affected directly via irrigation area expansion costs and indirectly via land scarcity or increases in other input costs to compensate for lower yields due to less irrigation (e.g. Nitrogen fertilizers) or investments in agricultural productivity	No direct effects modeled. Indirect effects can occur if production is reolcated to regions where labor productivity or production costs differ.	Direct effects of irrigation on labor cost and employment are not modeled. Indirect effects can occur if production is reolcated to regions where labor productivity or production costs differ.	No interaction modeled.	The bioeconomy supply is not directly influenced. Small indirect effects may occur via a different availability of couple products for the bioeconomy.	No direct costs of water management modeled, but costs of irrigation area expansion based on unit cost per hectare. Expansion of areas equipped for irrigation in some areas where no violations occur to balance reduction of irrigation where violations were prevalent. Systemic effects are induced by a reduction of yields in the areas which cannot use their irrigation anymore. This increases land sc…
BiodivOffset	The Biodiversity Intactness Index (BII) in each biome of each world region cannot decrease after 2020. BII reduction at one place can be compensated by increasing BII values in other places under the condition that they belong to the same biome in the same world region.	Changes in BII values are largely driven by changes in cropland and natural land cover. Biodiversity changes resulting from changes in landscape structure, management or pollution levels are not considered here. The reference land use (BII = 1) is assumed to have no human land use. The BII provides no information on ecosystem integrity and does not always reflect actual declines in biodiversity d…	No interaction modeled.	No interaction modeled.	No interaction modelled.	Increased forest and other land cover drives the biodiversity intactness index	Increased forest and other land cover drives the biodiversity intactness index	A strict BII target of 0.81 at the per-Biome level leads to a rigorous sparing of forest and other natural vegetation and an optimisation of agricultural land-use, which leads to the concentration of cropland in remaining land and lower crop diversity in these areas.	Reducing total land available for agricultural expansion may lead to intensification on existing agricultural land. This effect will increase total nutrient surplus.	Concentration of land use causes more irrigation and leads to increased environmental flow violations	Reductions in agricultural expansion within this scenario safeguard existing forest ecosystems and thus limit emissions from deforestation and land-use change. Thus, AFOLU emissions are reduced.	A reduction in emissions from AFOLU leads to a commensurate decrease in global surface warming.	The extreme land scarcity and the abandonment of produvtive land leads to higher per unit food prices	Indirect effects via increased expenditures for agricultural products.	A prescribed land use diversity can shift production to different regions, which can have higher or lower labor productivity and factor requirements, thereby leading to more or less agricultural employment (in results: no effect observed)	No interaction modeled.	The bioeconomy supply is not directly influenced. Small indirect effects may occur via a different availability of couple products for the bioeconomy.	No direct costs. Systemic effects are induced by a reduction of agricultural land which cannot be used for production anymore. This increases land scarcity, which induces costs for intensification, land expansion, irrigation expansion or trade.
NitrogenEff	Nitrogen uptake efficiency is increased through technical measures such as improved land manure application, spreader maintenance, improved agronomic practices, sub-optimal fertilizer applications, nitrification inhibitors and fertilizer free zones. We use maximum mitigation rates and the associated costs from Harmsen et al (2023), increasing labor and capital demand based on general regional cos…	We assume a reduction of N surplus proportional to the reduction of N2O in Harmsen et al (2023). While the measures described in Harmsen (2023) achieve a reduction of N2O via a reduction of the N surplus more generally, no information on reduction of other N substances (NO2, NH3, NO3-, N2) are provided in this dataset.	No interaction modeled.	No interaction modeled.	No interaction modelled.	No interaction modeled.	No interaction modeled.		The measures taken with the NitrogenEff scenario dramatically reduce nitrogen pollution.	No direct effect modeled. Indirectly higher nitrogen efficiency increases the yields and takes pressure out of the crop production system requiring less irrigation causing a slight decrease of environmental flow violations.	An increase in fertilizer use efficiency decreases N2O emissions, thus lowering green house gas emissions.	A reduction in emissions of N2O will decrease global surface warming, however over the timescale of this study the effects are marginal.	Nitrogen mitigation efforts increase production costs, leading indirectly to higher expenditures for agricultural products	Indirect effects via increased expenditures for agricultural products.	Nitrogen mitigation efforts increase factor requirements in agricultural production, thereby leading to higher labor demand and therefore higher employment	No interaction modeled.	The bioeconomy supply is not directly influenced. Small indirect effects may occur via a different availability of couple products for the bioeconomy.	Nitrogen efficiency increase requires mitigation costs i.e. increased investment, leading to higher production costs.
CropRotations	Crop rotations are incentivized with payments. Exceeding typical rotation lengths is priced to account for the external costs of less diverse agriculture. For the tax rate of rotation length exceedance, see supplementary data spreadsheet.	We do not cover ecosystem service feedbacks (e.g. on yields, pest control intensity) which would cause different systemic effects (e.g. via land scarcity, reduced costs)	No interaction modeled.	No interaction modeled.	No interaction modelled.	Wide crop rotations lead to less specialisation and less optimal cropping patterns. This leads to more conversion of intact land	Wide crop rotations lead to less specialisation and less optimal cropping patterns. This leads to more conversion of intact land	Penalty on narrow crop rotation leads to more sustainable practices and more diverse agriculture	Nutrient budgets in MAgPIE are calculated for entire rotations. We therefore account for, e.g. the benefits of nitrogen-fixing crops in rotations that become available to the subsequent crop via the crop residues. Improvements in the nitrogen use efficiency that could be the consequence of a more diverse rotation are yet not accounted for.	Longer crop rotations lead to less specialisation and less optimal cropping patterns. Therefore irrigation is necessary to increase yields and causes more environmental flow violations.	No direct interaction. At the system level, crop rotations may lead to less specialization and higher land requriements, causing increased cropland expansion and CO2 emissions.	Increases in GHG emissions from less specialization will lead to an increase in global surface temperature.	Indirect effects from higher production costs	Indirect effects via increased expenditures for agricultural products as well as redistribution of rotation incentives, leading to higher or lower poverty rates.	Crop rotation constraints can shift production to different regions, which can have higher or lower labor productivity and factor requirements, thereby leading to more or less agricultural employment	No interaction modeled.	The bioeconomy supply is not directly influenced. Small indirect effects may occur via a different availability of couple products for the bioeconomy.	No direct costs (crop rotations are incentivized via payments that are transfers (from farmers to government) rather than costs (requiring additional production factors). We do not account that longer crop rotations can require higher costs for marketing and for a diverse machine park; neither do we account that crop rotations can reduce crop protection costs or cause yield-improvements in subseq…
LandscapeHabitats	Permanent habitats are established within agricultural landscapes. Cropland expansion per cluster is constrained to 80% of the available potential cropland. The area of available potential cropland at grid cell level is derived from Zabel et al. (2014). This aims at conserving at least 20% permanent semi-natural habitats at the landscape level (e.g. for pollination, pest control, soil protection)…	The measure is implemented at the cluster resolution. The use of historical cropping patterns for the downsclaing algorithm to 0.5°*0.5° yet leads to the vioalation of the 20% threshold in <1% of the grid cells, containing <5% of the global croparea. Although not modelled, LandscapeHabitats could be subject to any management that sustains native species diversity, such as extensive grazing.	No interaction modeled.	No interaction modeled.	No interaction modeled.	More permanent habitats in cropland landscapes have a positive effect on the BII in cropland landscapes	The reduction of cropland area in favour of more permanent habitats in cropland landscapes may increase the pressure on hotspot landscapes.	More permanent habitats in agricultural landscapes also requires more specialisation to attain the same production levels. This results in a decrease of crop diversity.	No interaction modeled.	The reduction of cropland area in favour of more permanent habitats in cropland landscapes increases land scarcity and therefore indirectly environmental flow violations due to increased competition for land and required intensification.	No direct interaction, however preserving 20% of all croplands may lead to cropland expansion at larger scales. This could increase or decrease the emissions of green house gases base on where and to what extent this expansion occurs. In practice, we find that LandscapeHabitats marginally lowers the emissions of green house gases.	Based on the direction and magnitude of cropland expansion this FSM could either increase or decrease surface warming. In practice we find no effect over the timescale of this study.	Indirect effects from higher production costs	Indirect effects via increased expenditures for agricultural products.	No effect on agricultural employment	No interaction modeled.	The bioeconomy supply is not directly influenced. Small indirect effects may occur via a different availability of couple products for the bioeconomy.	Reduction of cropland areas leads to production and land expansion in lower-yield areas, increasing production costs
RiceMitigation	Technical measures such as direct seeding, improved residue management, alternated flooding and drainage, and changed fertilization. We use the marginal mitigation cost curve by Harmsen et al (2023) to reduce baseline emissions.		No interaction modeled.	No interaction modeled.	No interaction modelled.	No direct interactions.	No direct interactions.	No direct interactions	No modelled interactions. In reality, flooding regimes and a switch from urea to ammoium sulfate may influence leaching and NUE.	No interaction modeled. (There seems to be no effect and I also don't really know how we model the interaction. Maybe something like: less rice production due to pricing of methane emissions on rice with associated lower water withdrawals and lower environmental flow violations. (But at the same time there could be relocation / other crops that are irrigated). benni.bausb@googlemail.com	A reduction in CH4 emissions from improved mitigation measures within this scenario will reduce total emissions from agriculture.	A reduction in emissions from CH4 within the RiceMitigation scenario leads to a commensurate reduction in global surface temperature.	Indirect effects from higher production costs	Indirect effects via increased expenditures for agricultural products.	Mitigation efforts lead to higher factor requirements in agricultural production, thereby leading to slightly higher labor demand and therefore higher employment	No interaction modeled.	The bioeconomy supply is not directly influenced. Small indirect effects may occur via a different availability of couple products for the bioeconomy.	Mitigation of emissions requires increased investment, leading to higher production costs for rice.
LivestockManagement	Livestock systems are intensified in particular in low-income countries, resulting in a more efficient conversion of feed into products. In addition, emissions from enteric fermentation are mitigated via the full set of technical measures of Harmsen et al (2023) and associated costs. Intensification of livestock systems is represented via exogenously assuming improved future livestock productivit…	Improvements in livestock productivity and feeding are achieved through exogenous assumptions and not implemented by using a process-based representation of dynamics and policies. In particular, the costs required to transform livestock production systems are not accounted for. In addition, feedback effects of the technical mitigation measures on livestock productivity are not considered.	No interaction modeled.	No interaction modeled.	No interaction modelled.	Intensification of livestock production involves a shift from pasture-based to cropland-based feeds, resulting in conversion of pastures to cropland. This process reduces the BII in particular in cropland landscapes due to the higher demand for feed concentrates.	Livestock intensification does not lead to a significant reduction in hotspot landscapes.	Livestock intensification increases demand for concentrate feeds cultivated on cropland and affects the composition of crop production, leading to an overall reduction in crop diversity.	Intensification of livestock production systems reduces overall feed demand, but also involves a shift from pasture-based to cropland-based feeds, which increases crop production and fertilization requirements. Changes in feed demand and feed composition also affect biological nitrogen fixation through changes in legume production and influence manure availability and resulting nutrient losses fr…	Environmental flow violations are influenced through several channels. On the one hand, livestock intensification leads to pasture-to-cropland conversion, which in some regions can absorb pressures on land, reducing incentives to irrigate and expand irrigation infrastructure compared to the reference scenario. On the other hand, demand for concentrate feed is higher, increasing total crop product…	Methane emissions from enteric fermentation and non-CO2 emissions from feed production (e.g., from agricultural soils) change as a result of the lower total amount and different composition of feed. Methane emissions from enteric fermentation are additionally reduced via technical measures. Similarly, levels of manure excretion are affected by the amount and composition of feed, which also change…	Improved livestock management affects CO2 emissions from land-use change and non-CO2 emissions from various sources in the agricultural sector. Impacts of livestock management on emissions outside the AFOLU sector are not considered, e.g. due to on-farm machinery and energy use as well as different stable and farm buildings.	Livestock intensification increases demand for concentrate feeds cultivated on cropland and drives cropland expansion, resulting in higher costs for feed and also for food production. Mitigation of emissions from enteric fermentation additionally increases agricultural production costs. Both processes lead to higher food prices and thus higher expenditures.	Livestock intensification results in higher food expenditures, which also influence poverty estimates. However, other impact channels through which livestock intensification could affect poverty, such as agricultural employment, are not modeled.	Mitigation from enteric fermentation leads to higher factor requirements in agricultural production, thereby leading to higher labor demand and therefore higher employment	No interaction modeled.	The bioeconomy supply is not directly influenced. Small indirect effects may occur via a different availability of couple products for the bioeconomy.	Livestock intensification increases demand for concentrate feeds cultivated on cropland and drives crop production and cropland expansion, which, in addition to higher costs for feed production, involves land conversion costs and increases costs for agricultural inputs in the crop sector. Costs for mitigating emissions from enteric fermentation additionally increase agricultural production costs.…
ManureManagement	Improved animal waste management reduces losses and emissions during collection and storage of manure using a set of measures at additional costs. 50% of manure excreted in confinements is managed in anaerobic digesters, while the remainder is still managed according to the current mix. Anaerobic digesters are assumed to have a 90% recycling rate of manure, accounting for some remaining losses in…	CH4 and N2O mitigation is estimated using two distinct approaches, which should however be mostly consistent. Cost estimates are only available for the CH4 mitigation.	No interaction modeled.	No interaction modeled.	No interaction modelled.	Not simulated: BII index is not affected by nitrogen pollution.	Not simulated: BII index is not affected by nitrogen pollution.	No direct interaction modeled.	Simulated: Direct reduction of Nr surplus from animal waste management. Higher recycling rate leads to substitution of inorganic fertilizer by manure. Not simulated: Due to more difficult dosing, manure is considered to have a lower fertilizer equivalent than inorganic fertilizer, such that higher manure recycling rates could result in falling cropland NUE.	No interation modeled. Right, benni.bausb@googlemail.com? (In the results: no change; if at all slight decrease of environmental flow violations)	Simulated: Shift between animal waste management systems also leads to different emission factors for N2O, NH3 (relevant for indirect N2O) and CH4, all parametrized according to IPCC (2006). Not-simulated: Poorly managed anaerobig digesters may lead to leakage of CH4, which is not accounted for here.	A reduction in emissions from AWM leads to a commensurate decrease in global surface temperature.	Indirect effects from higher production costs		Measures to improve animal waste management lead to increased factor requirements in agricultural production, thereby leading to higher labor demand and therefore higher emplyoment	No interaction modeled.	The bioeconomy supply is not directly influenced. Small indirect effects may occur via a different availability of couple products for the bioeconomy.	The model covers the cost savings from fertilizer being replaced by manure, as well as the costs of implementing technical measures to reduce CH4 emissions. The model covers neither the investment and opportunity costs of N2O mitigation, but the use of anaerobic digesters could become cost-neutral or even profitable as biogas can be marketed.
SoilCarbon	Soil carbon degradation is disincentivized and soil carbon sequestration is incentivized through a carbon price on C in soil carbon (including litter layer). Disincentivized measures include transition of natural land or pasture to cropland, incentivized measures include irrigation or perennial crops.	The GHG price used for soil carbon pricing is lower than the one used in the other economic sectors (here a price of 1000 Mt budget is used), as higher carbon prices in the LU sector have low additional mitigation effects, but create unnecessary trade-offs with other outcome indicators like food expenditure. Soil carbon losses on cropland do not change with different management levels (e.g. highe…	No interaction modeled.	No interaction modeled.	No interaction modelled.	Conservation of soil carbon leads to more land conversion cropland landscapes, since these are areas with lower relative soil carbon content.	Conservation of soil carbon leads to less land conversion in areas with high soil carbon content.		Because positive feedbacks on yields are currently not considered within the MAgPIE model, there is no direct relation between the SoilCarbon FSM and nitrogen surplus.	carbon price incentivizes irrigation and leads to higher environmental flow violations.	Incentivizing sequestration of soil carbon leads to dramatic reductions in total emissions from AFOLU.	As sequestration of soil carbon reduces emissions from AFOLU, it leads to a reduction in global surface warming.	Indirect effects from higher production costs	Indirect effects via increased expenditures for agricultural products.	no effect on agricultural employment	No interaction modeled.	The bioeconomy supply is not directly influenced. Small indirect effects may occur via a different availability of couple products for the bioeconomy.	Conservation of soil carbon leads to production and land expansion in lower-yielding areas, leading indirectly to higher production costs.
Population	Population growth is reduced, in particular in low-income countries, switching population projections (Kc and Lutz, 2017) and built-up area projections (Hurtt et al 2020) from SSP2 to SSP1.	No interaction with macroeconomy (GDP per capita stays constant), no interaction with energy system (non-food emissions stay the same for global warming indicator), higher education which is driver behind reduced population growth has no further implications on the model	Population growth is slightly lower in low-income countries, therefore the absolute number of people underweight decreases (but relative underweight rates are not affected).	While relative overweight shares are not impacted which are driven by SSP2 per-capita income, lower total population reduces the number of obese people.	A lower population will result in fewer total potential life years. Thus, holding disease-related mortality constant the number of life years lost will nevertheless decline.	Lower population results in lower food demand and production, reducing the need to expand agricultural areas into intact ecosystems.	Lower population results in lower food demand and production, reducing the need to expand agricultural areas into intact ecosystems.	Due to lower food demand, there is less land scarcity and therefore less incentives to shorten crop rotations.	Lower population results in lower food demand and production, reducing nitrogen surpluses from agricultural production.	Lower population results in lower food demand and production, reducing pressure on agricultural production as well as irrigation leading to lower environmental flow violations.	Lower population results in lower food demand and production, reducing emissions from agricultural production as well as the need to for agricultural expansion. This decreases emissions from deforestation.	Lower population results in lower food demand and production, reducing emissions from agricultural production as well as the need to expand areas, which leads to deforestation emissions. A process not considered here are lower energy system emissions due to lower population, which could not be isolated from lower socioeconomic development and are therefore accounted for in the SocioEconDevelop an…	The per-capita expenditure for agricutlural products is not directly affected. As expenditures are the population-weighted average, a reduction of population in low-income regions leads to an increase of average expenditures.	No effect on per capita poverty rates projected as per capita incomes and Gini coefficient do not change, although absolute numbers lower	Lower population results in lower food demand and production, thereby also reducing agricultural employment	No interaction modeled.	Lower population causes also a reduction in the demand for material usage (e.g. cosmetica) of agricultural products.	No direct costs. System effects come from altered food demand of a smaller population.
HumanDevelop	Human development is fairer, with higher social justice and better institutions and education. Switch from SSP2 to SSP1 projections (A) for per-capita gross domestic product and Gini-coefficient, which implies fast economic growth in particular in low-income regions, and a more equal income distribution between countries and within countries; (B) for non-food related health risks; (C) for the par…	The interaction between faster socio-economic development (in particular education) and slower population growth due to lower fertility is not accounted for in this scenario, but only in the "Ext.Transf." scenario which includes both SSP1 socio-economic development and SSP1 population growth.	Socioeconomic development drives the nutrition transition. Based on Bodirsky et al (2020), we estimate how underweight declines with higher socio-economic development. Dietary composition also shifts in line with the socio-economic development towards animal and processed products as well as fruits and vegetables to make the transition consistent.	Socioeconomic development drives the nutrition transition. Based on Bodirsky et al (2020), we estimate how overweight and obesity increases with higher socio-economic development. Dietary composition also shifts in line with the socio-economic development towards animal and processed products as well as fruits and vegetables to make the transition consistent.	Socioeconomic development drives the nutrition transition and reduces phyiscal activity levels. Based on Bodirsky et al (2020), we estimate how overweight and obesity increases with higher socio-economic development. Dietary composition also shifts in line with the socio-economic development towards animal and processed prodcuts as well as fruits and vegetables to make the transition consistent. …	Shifts in dietary composition in line with the socio-economic development towards animal and processed products as well as fruits and vegetables puts additional pressure on cropland landscapes.	The biodiverstiy intactness index is mainly influenced by a faster rising food demand and a shift towards animal products, causing more land expansion of natural vegetation.	The shannon crop diversity index is influenced by a differet composition of agricultural production, including a food demand shifting from grains and pulses towards animal products, sugar, oil, alcohol, fruits and vegetables, and including an increase of feed demand as well as a shift towards concentrate feeds.	Nitrogen surplus is mainly influenced by a faster rising food demand and a shift towards animal products, causing additional nitrogen pollution in feed production and animal waste management. However, this is offset by technological progress and resultant increases in soil nitrogen uptake efficiency, leading to less total nutrient surplus.	Economic development under SSP1 affects food demand and food composition such that the pressure on agricultural production and irrigation is reduced resulting into lower environmental flow violations. (@Benni: not entirely sure. For me it could be both directions, but that's what we see in the scenario table: slight derease... I think it can be that diets in developed countries are more sustainab…	Greenhouse gas emissions are mainly influenced by a faster rising food demand and a shift towards animal products, causing emissions in agricutlural production and land use change.	Global warming is caused by the emissions from agriculture, land use change and other economic sectors. Increases in these emissions will consequently lead to global warming. However, in our scenario design, there was no appropriate REMIND scenario with which to pair our MAgPIE results. Therefore, we refrained from running this scenario through MAGICC.	With socio-economic development, people shift towards more affluent diets and spend more on food in general.	Poverty is influnced firstly via higher per-capita incomes, secondly via a change in the gini coefficient of income inequality, and thirdly by an increase of food expenditures.	Faster GDP growth in SSP1 (especially in low-income countries) leads to a faster increase in labor productivity and a faster substitution of labor by capital, both resulting in lower agricultural employment	Faster GDP growth in SSP1 leads to stronger increase in agricultural wages	The bioeconomy supply is not directly influenced. Small indirect effects may occur via a different availabiltiy of couple products for the bioeconomy.	No direct costs. Systemic effects reflect higher demand for more affluent diets and a higher food waste share.
EnergyTrans	Sustainable development in energy, transport, urbanization. Bioenergy switched to SDP900Gt scenario by Soergel et al. (2021), non-ag water demand changes from SSP2 to SSP1 (Wada et al. 2016), active transportation changes physical activity levels from sedentary to moderate activity (Bodirsky et al 2020)		No interaction modeled.	No interaction modeled. Non-modeled interactions could include reduced obesity in scenarios with higher physical activity levels due to more active transportation.	No interaction modeled. Non-modeled interactions could include reduced air pollution from energy system, or reduced obesity in scenarios with higher physical activity levels due to more active transportation.	A higher demand for bioenergy in the energy transition scenario could lead to in more conversion of intact land in cropland landscapes. However, this negative effect on the BII might be partly offset by positive impacts from a higher amount of perennial bioenergy crops, which have a higher BII than most annual crops.	A higher demand for bioenergy in the energy transition scenario leads to slightly more conversion of intact land in hotspot landscapes		Bioenergy demand requires additional nitrogen fixation, thus increasing agricltural expansion and nitrogen inputs. Systemic effects could also include, e.g. a reduction of natural nitrogen fixation due to deforestation. Not covered is that the energy transformation would increase the price of inorganic fertilizers due to mitigation costs.	The energy transition includes the industry, manufacturing and domestic water withdrawals to follow an SSP1 (rather than SSP2) pathway. Non-agricultural water withdrawals decrease and lower the pressure on water ressources resulting in fewer environmental flow violations.	Greenhouse gas emissions in the food system are rising due to bioenergy cultivation and due to rising caloric needs for activte transportation.	Global warming is affected by two dynamics: Greenhouse gas emissions in the food system are slightly increased. At the same time, greenhouse gas emissions in the energy and transport sectors are strongly reduced.	No effect on expenditure for agricultural products	No effect on expenditure for agricultural products	A higher demand for bioenergy in the energy transition scenario leads to overall higher agricultural production and thereby higher employment	No interaction modeled.	The bioeconomy supply is not directly influenced. Small indirect effects may occur via a different availabiltiy of couple products for the bioeconomy.	No direct costs. Systemic effects reflect a) additional production costs for bioenergy, b) higher land scarcity due to increased urbanisation, c) less water scarcity due to reduced demand for water from non-energy sectors, and d) slightly higher food demand due to increased physical activtiy for active transportation.
Bioplastics	Of the projected total plastic demand (675 Mt by 2050 (OECD, 2022)), 30% is replaced by bioplastics. Bioplastics require bio-materials as substrates.	Conversion rates (biomass substrate to bioplastic as well as primary products to starch and cellulose) and the share of each biomass substrate are kept constant over time. Glycerol is assumed to be available in sufficient quantities as it is a byproduct from other production, but not modeled explicitly. Global bioplastic demand is disaggregated to regional level based on population size.	No interaction modeled.	No interaction modeled.	No interaction modeled.	The additional material demand for bioplastic production increases overall agricultural production and thereby has a minimal negative effect on cropland landscape BII	The additional material demand for bioplastic production increases overall agricultural production and thereby has a minimal negative effect on hotspot landscapes BII	The additional material demand for bioplastic production increases overall agricultural production and thereby has a slight negative effect on crop diversity	The additional material demand for bioplastic production increases overall agricultural production and thereby has a minimal effect increasing nitrogen surplus.	The additional material demand for bioplastic production increases overall agricultural production which leads to slightly higher pressure on water resources because of higher land use competition and therefore slightly more environmental flow violations	The additional material demand for bioplastic production increases overall agricultural production and thereby has a minimal effect increasing GHG emissions from land use and land use change.	Increases in GHG emissions due to increased material demand would increase global surface temperature. However, this interaction was not modelled in this study, as there was no corresponding REMIND scenario available.	In theory, additional material demand for biopastic production can lead to higher land pressure and in turn higher agricultural prices and agricultural expenditure. However, the additional material demand is not high enough to show visible effects on the agricultural expenditure.	No effect on people living below poverty threshold, as expenditure for agriculutral products is not effected	The additional material demand for bioplastic production increases overall agricultural production and thereby leads to higher employment	No interaction modeled.	The supply of raw products for plastic production is increased exogeously as part of the measure (see description). Bioeconomy supply of timber is not influenced.	Systemic effect include higher costs for the production of substrates of bioplastic production, as well as higher land and water scarcity.
TimberCities	Wood is used as construction material for cities. We assume that 50% of new urban dwellers (after 2020) are housed in buildings made of engineered wood to replace carbon-intensive steel and concrete housing construction(Mishra et al. 2022). This increases future timber demand by 2212 million m3 (compared to 2020) and thereby increases the need for increased harvesting from forests.	No CO2 fertilization; no differentiation between hardwood and softwood: static rotation lengths in forest plantations; does not account for changes in soil carbon; assumes static production technologies and emission factors; does not account for rebuilding existing buildings; no albedo affect accounting due to extensive tree planting; does not account for timber prices	No interaction modeled.	No interaction modeled.	No interaction modeled.	Conversion of existing naturally forested areas can decrease BII. Reforestation on cropland which used to be forests can lead to increase in BII	Conversion of existing naturally forested areas can decrease BII. Conversion of non-forested land to forests can contribute to an increase in BII	Indirect effects: Plantations increase land scarcity and therfore lead to shorter crop rotations.	No direct fertilization requirements for plantations required in our model. Indirect effects via plantation land requirements include cropland intensification which can increase nitrogen use for intensifying cropland use.	No direct impact on environmental flow violations. Indirect impacts due to increased land scarcity. This might result in increasing pressure on water resources because of increasing land use competition and therefore more environmental flow violations	Greenhouse gas emissions from land use and landuse change in Gt CO2 equivalents. Separately accounts for long term storage in harvested wood products (including buildings). Emissions due to decay in the existing harvested wood product pool. All calculations based on IPCC 2019 refinement.	Greenhouse gas emissions from land use and landuse change in Gt CO2 equivalents. Albedo effects (Windisch et al. 2022) are not considered due to afforestation/reforestation.	No direct effects. Indirectly results in increased food prices due to land scarcity for agricultural purposes.	Indirect effects via increased expenditures for agricultural products.	No direct effect: employment does not include employment in forestry	No interaction modeled.	The supply of timber for the bioeconomy is increased exogenously as part of the measure (see description). Bioeconomy supply of other materials is not directly influenced.	Direct costs include costs for establishment of plantations and for harvest. Also includes cost of per unit DM production from all forests and production of residues. Systemic effects include higher land and water scarcity.

## Sheet: Crop rotations
Crop groups subject to practices	Rotation practices	Ecosystem service penalty for the violation of rotation practices, expressed in USD05 equivalents of additional management efforts per hectare	Tax (positive number) or subsidy (negative number) if rotation practices are met (additional to Ecosystem service penalty), in USD05 per hectare	Ecosystem service rational	Tax/Subsidy rational
		Payments are additional if multiple criteria are met
Fallow	One fallow every 5 years	500	500	Fallows allow soils to recover and provide ecosystem services.	Fallows provide biodiverstiy as common good.
	Four fallows every 5 years (e.g. shifting cultivation)	300	-200	Fallows allow soils to recover and provide ecosystem services.	Avoid this practice that underutilizes ressources; use subsidies rather than taxes to avoid harsh distributional effects in poor countries where this practice is very common.
Cereals	One non-cereal crop every 4 years	100	100	Reduces pest pressure and nutrient depletion.	Tax is justified by external effects of ecosystem services also on neighbouring land.
	One non-cereal crop every 3 years	100	100	Reduces pest pressure and nutrient depletion.	Tax is justified by external effects of ecosystem services also on neighbouring land.
	One cereal at least every 4 years	100	100	Cereals loosen soil structure.	Tax is justified by external effects of ecosystem services also on neighbouring land.
Perennial crops and diverse crop groups (Sugar cane, oilpalms, cotton, forage crops, vegetables fruits and nuts fast-growing bioenergy trees, fast-growing bionergy grasses)	At least one other crop every 5 years	200	1800	Reduces pest pressure and nutrient depletion.
Sunflower, Rapeseed	Together only once every 6.66 years	500	0	Crops are sensitive to cultivation in sequence.	-
Pulses, soybean, groundnut, forage crops	Together only once every 3 years	500	0	Crops are sensitive to cultivation in sequence.	-
	One of them at least every 10 years	100	400	Legumes enrich soils with nitrogen, mobilize phosphorus, retain water, enhance pollination and reduce pest pressure.	Legumes enrich soils with nitrogen, mobilize phosphorus, retain water, enhance pollination and reduce pest pressure.
Sugar beet, Rapeseed, Potato, Sweet potato	Roots and rapes only every 3 years	500	0	Crops are sensitive to cultivation in sequence (Linder 2019)	-
Rice	Maximum every second year	200	300	Reduces pest pressure and nutrient depletion.	Tax is justified by external effects of ecosystem services also on neighbouring land.
Wheat and other temperate cereals	Maximum two of three years	200	300	Reduces pest pressure and nutrient depletion.	Tax is justified by external effects of ecosystem services also on neighbouring land.
Millet, Sorghum	Maximum every second year	200	300	Reduces pest pressure and nutrient depletion.	Tax is justified by external effects of ecosystem services also on neighbouring land.
Maize	Maximum every second year	200	300	Reduces pest pressure and nutrient depletion.	Tax is justified by external effects of ecosystem services also on neighbouring land.
Sunflower, Rapeseed, Sugar beet, Cassava and sweet potato, Potato, Vegetables fruits and nuts	One of them at least every 10 years	100	400	More diverse crop rotations reduce pest pressure and nutrient depletion.	Tax is justified by external effects of ecosystem services also on neighbouring land. Tax tries to disincentivize agglomeration of minor crops, e.g. for shortening transport distances.
Energy crops (sugar cane, oilpalm, fast-growing bioenergy trees, fast-growing bioenergy grasses)	At least once every 20 years	0	500	-	Use of energy crops for example in agroforestry systems, reducing erosion and improving water management. Incentivize more equal distribution in space to avoid bioenergy monoculture landscapes.
